# Supplementary material for: Plastome Sequence Determination and Comparative Analysis for Members of the Lolium-Festuca Grass Species Complex
Source: PubMed Central journal article supplement (PMC3618348; doi:10.1534/g3.112.005264), 2013-04-01
Supplement: supp_g3.112.005264_TableS1.pdf [file supp_g3.112.005264_TableS1.pdf]

**Plastome sequence determination and comparative analysis for members of the *Lolium-Festuca* grass species complex**

Melanie L. Hand<sup>\*,†,‡</sup>, German C. Spangenberg<sup>\*,†,‡</sup>, John W. Forster<sup>\*,†,‡</sup>, Noel O.I. Cogan<sup>\*,†</sup>

\* Department of Primary Industries, Biosciences Research Division, AgriBio, the Centre for AgriBioscience, La Trobe University Research and Development Park, Bundoora, Victoria 3083, Australia

† Dairy Futures Cooperative Research Centre, Australia

‡ La Trobe University, Bundoora, Victoria 3086, Australia

DOI: 10.1534/g3.112.005264

**Table S1 Details of the reference genomes used to predict the level of plastid or bacterial genome sequence present in the total sequencing output of each species.**

| Source      | Species and genome description                                                           |
|-------------|------------------------------------------------------------------------------------------|
| NC_009950.1 | <i>Lolium perenne</i> chloroplast, complete genome                                       |
| FJ466687.2  | <i>Festuca arundinacea</i> cultivar KY-31 chloroplast, complete genome                   |
| EF115541.1  | <i>Hordeum vulgare</i> subsp. <i>vulgare</i> cultivar Morex chloroplast, complete genome |
| NC_002762.1 | <i>Triticum aestivum</i> chloroplast, complete genome                                    |
| EU325680.1  | <i>Brachypodium distachyon</i> cultivar Bd21 chloroplast, complete genome                |
| NC_000908.2 | <i>Mycoplasma genitalium</i> G37, complete genome                                        |
| NC_002696.2 | <i>Caulobacter crescentus</i> CB15 chromosome, complete genome                           |
| NC_003919.1 | <i>Xanthomonas axonopodis</i> pv. <i>citri</i> str. 306 chromosome, complete genome      |
| NC_004923.1 | <i>Aeromonas salmonicida salmonicida</i> A449 plasmid pAsa1, complete sequence           |
| NC_004924.1 | <i>Aeromonas salmonicida salmonicida</i> A449 plasmid pAsa3, complete sequence           |
| NC_004925.1 | <i>Aeromonas salmonicida salmonicida</i> A449 plasmid pAsa2, complete sequence           |
| NC_006270.3 | <i>Bacillus licheniformis</i> ATCC 14580 chromosome, complete genome                     |
| NC_006582.1 | <i>Bacillus clausii</i> KSM-K16, complete genome                                         |
| NC_007488.1 | <i>Rhodobacter sphaeroides</i> 2.4.1 plasmid B, complete sequence                        |
| NC_007489.1 | <i>Rhodobacter sphaeroides</i> 2.4.1 plasmid C, complete sequence                        |
| NC_007490.1 | <i>Rhodobacter sphaeroides</i> 2.4.1 plasmid D, complete sequence                        |
| NC_007493.1 | <i>Rhodobacter sphaeroides</i> 2.4.1 chromosome 1, complete sequence                     |
| NC_007494.1 | <i>Rhodobacter sphaeroides</i> 2.4.1 chromosome 2, complete sequence                     |
| NC_007614.1 | <i>Nitrospira multififormis</i> ATCC 25196 chromosome, complete genome                   |
| NC_008009.1 | <i>Candidatus Koribacter versatilis</i> Ellin345 chromosome, complete genome             |
| NC_008255.1 | <i>Cytophaga hutchinsonii</i> ATCC 33406 chromosome, complete genome                     |
| NC_008686.1 | <i>Paracoccus denitrificans</i> PD1222 chromosome 1, complete sequence                   |
| NC_008687.1 | <i>Paracoccus denitrificans</i> PD1222 chromosome 2, complete sequence                   |

| Source      | Species and genome description                                                           |
|-------------|------------------------------------------------------------------------------------------|
| NC_008688.1 | <i>Paracoccus denitrificans</i> PD1222 plasmid 1, complete sequence                      |
| NC_008765.1 | <i>Acidovorax</i> sp. JS42 plasmid pAOVO01, complete sequence                            |
| NC_008766.1 | <i>Acidovorax</i> sp. JS42 plasmid pAOVO02, complete sequence                            |
| NC_008782.1 | <i>Acidovorax</i> sp. JS42 chromosome, complete genome                                   |
| NC_008825.1 | <i>Methylibium petroleiphilum</i> PM1 chromosome, complete genome                        |
| NC_008826.1 | <i>Methylibium petroleiphilum</i> PM1 plasmid RPME01, complete sequence                  |
| NC_009007.1 | <i>Rhodobacter sphaeroides</i> 2.4.1 plasmid A, partial sequence                         |
| NC_009008.1 | <i>Rhodobacter sphaeroides</i> 2.4.1 plasmid E, complete sequence                        |
| NC_009138.1 | <i>Herminiimonas arsenicoxydans</i> chromosome, complete genome                          |
| NC_009348.1 | <i>Aeromonas salmonicida</i> subsp. <i>salmonicida</i> A449, complete genome             |
| NC_009349.1 | <i>Aeromonas salmonicida</i> subsp. <i>salmonicida</i> A449 plasmid 4, complete sequence |
| NC_009350.1 | <i>Aeromonas salmonicida</i> subsp. <i>salmonicida</i> A449 plasmid 5, complete sequence |
| NC_009441.1 | <i>Flavobacterium johnsoniae</i> UW101 chromosome, complete genome                       |
| NC_009483.1 | <i>Geobacter uraniireducens</i> Rf4 chromosome, complete genome                          |
| NC_009613.1 | <i>Flavobacterium psychrophilum</i> JIP02/86 chromosome, complete genome                 |
| NC_009617.1 | <i>Clostridium beijerinckii</i> NCIMB 8052 chromosome, complete genome                   |
| NC_010162.1 | <i>Sorangium cellulosum</i> 'So ce 56' chromosome, complete genome                       |
| NC_010394.1 | <i>Mycobacterium abscessus</i> ATCC 19977 unnamed plasmid, complete sequence             |
| NC_010397.1 | <i>Mycobacterium abscessus</i> ATCC 19977 chromosome 1, complete sequence                |
| NC_010524.1 | <i>Leptothrix cholodnii</i> SP-6 chromosome, complete genome                             |
| NC_010571.1 | <i>Opitutus terrae</i> PB90-1 chromosome, complete genome                                |
| NC_010655.1 | <i>Akkermansia muciniphila</i> ATCC BAA-835 chromosome, complete genome                  |
| NC_010794.1 | <i>Methylacidiphilum infernorum</i> V4, complete genome                                  |
| NC_010830.1 | <i>Candidatus Amoebophilus asiaticus</i> 5a2 chromosome, complete genome                 |
| NC_010943.1 | <i>Stenotrophomonas maltophilia</i> K279a chromosome, complete genome                    |

| Source      | Species and genome description                                                                    |
|-------------|---------------------------------------------------------------------------------------------------|
| NC_011297.1 | <i>Dictyoglomus thermophilum</i> H-6-12, complete genome                                          |
| NC_011880.1 | <i>Cyanothece</i> sp. PCC 7425 plasmid pP742501, complete sequence                                |
| NC_011882.1 | <i>Cyanothece</i> sp. PCC 7425 plasmid pP742503, complete sequence                                |
| NC_011884.1 | <i>Cyanothece</i> sp. PCC 7425 chromosome, complete genome                                        |
| NC_011885.1 | <i>Cyanothece</i> sp. PCC 7425 plasmid pP742502, complete sequence                                |
| NC_012791.1 | <i>Variovorax paradoxus</i> S110 chromosome 1, complete sequence                                  |
| NC_012792.1 | <i>Variovorax paradoxus</i> S110 chromosome 2, complete genome                                    |
| NC_013037.1 | <i>Dyadobacter fermentans</i> DSM 18053 chromosome, complete genome                               |
| NC_013061.1 | <i>Pedobacter heparinus</i> DSM 2366 chromosome, complete genome                                  |
| NC_013124.1 | <i>Acidimicrobium ferrooxidans</i> DSM 10331 chromosome, complete genome                          |
| NC_013132.1 | <i>Chitinophaga pinensis</i> DSM 2588 chromosome, complete genome                                 |
| NC_013173.1 | <i>Desulfomicrobium baculatum</i> DSM 4028, complete genome                                       |
| NC_013190.1 | <i>Candidatus Accumulibacter phosphatis</i> clade IIA str. UW-1 plasmid pAph02, complete sequence |
| NC_013191.1 | <i>Candidatus Accumulibacter phosphatis</i> clade IIA str. UW-1 plasmid pAph03, complete sequence |
| NC_013193.1 | <i>Candidatus Accumulibacter phosphatis</i> clade IIA str. UW-1 plasmid pAph01, complete sequence |
| NC_013194.1 | <i>Candidatus Accumulibacter phosphatis</i> clade IIA str. UW-1 chromosome, complete genome       |
| NC_013730.1 | <i>Spirosoma linguale</i> DSM 74 chromosome, complete genome                                      |
| NC_013731.1 | <i>Spirosoma linguale</i> DSM 74 plasmid pSLIN01, complete sequence                               |
| NC_014148.1 | <i>Planctomyces limnophilus</i> DSM 3776 chromosome, complete genome                              |
| NC_014149.1 | <i>Planctomyces limnophilus</i> DSM 3776 plasmid pPLIM01, complete sequence                       |
| NC_014153.1 | <i>Thiomonas intermedia</i> K12 chromosome, complete genome                                       |

| Source      | Species and genome description                                             |
|-------------|----------------------------------------------------------------------------|
| NC_014501.1 | <i>Cyanothece</i> sp. PCC 7822 chromosome, complete genome                 |
| NC_014502.1 | <i>Cyanothece</i> sp. PCC 7822 plasmid Cy782203, complete sequence         |
| NC_014503.1 | <i>Cyanothece</i> sp. PCC 7822 plasmid Cy782204, complete sequence         |
| NC_014504.1 | <i>Cyanothece</i> sp. PCC 7822 plasmid Cy782205, complete sequence         |
| NC_014533.1 | <i>Cyanothece</i> sp. PCC 7822 plasmid Cy782201, complete sequence         |
| NC_014534.1 | <i>Cyanothece</i> sp. PCC 7822 plasmid Cy782202, complete sequence         |
| NC_014535.1 | <i>Cyanothece</i> sp. PCC 7822 plasmid Cy782206, complete sequence         |
| NC_014655.1 | <i>Leadbetterella byssophila</i> DSM 17132 chromosome, complete genome     |
| NC_014738.1 | <i>Riemerella anatipestifer</i> DSM 15868 chromosome, complete genome      |
| NC_014750.1 | <i>Marivirga tractuosa</i> DSM 4126 plasmid pFTRAC01, complete sequence    |
| NC_014759.1 | <i>Marivirga tractuosa</i> DSM 4126 chromosome, complete genome            |
| NC_014816.1 | <i>Asticcacaulis excentricus</i> CB 48 chromosome 1, complete sequence     |
| NC_014817.1 | <i>Asticcacaulis excentricus</i> CB 48 chromosome 2, complete sequence     |
| NC_014818.1 | <i>Asticcacaulis excentricus</i> CB 48 plasmid pASTEX01, complete sequence |
| NC_014819.1 | <i>Asticcacaulis excentricus</i> CB 48 plasmid pASTEX02, complete sequence |
| NC_014960.1 | <i>Anaerolinea thermophila</i> UNI-1, complete genome                      |
